# Supplementary material for: Gametes deficient for Pot1 telomere binding proteins alter levels of telomeric foci for multiple generations
Source: PubMed Central journal article supplement (PMC7862594; doi:10.1038/s42003-020-01624-7), 2021-02-04
Supplement: 42003_2020_1624_MOESM3_ESM.pdf [file 42003_2020_1624_MOESM3_ESM.pdf]

## **Description of Additional Supplementary Files**

**File name: Supplementary Data 1**

**Description:** Excel file of sample sizes for each Pot1 foci quantification panel.
